# Supplementary material for: Strain-induced quantum phase transition in the C3Sc4 monolayer: towards multiple gapless fermions
Source: Royal Society of Chemistry journal article supplement (doi:10.1039/d1nr00382h), 2021-01-01
Supplement: d1nr00382h1.pdf [file d1nr00382h1.pdf]

## Supplementary information

### Strain-induced quantum phase transition in C<sub>3</sub>Sc<sub>4</sub> monolayer: Towards to multiple gapless fermions

Yilin Han<sup>a</sup>, Ying Liu<sup>b\*</sup>, Jianhua Wang<sup>a</sup>, Tie Yang<sup>a</sup>, Feng Zhou<sup>a</sup>, Minquan Kuang<sup>a</sup>,

Xiaotian Wang<sup>a\*</sup>, and Gang Zhang<sup>c\*</sup>

<sup>a</sup>School of Physical Science and Technology, Southwest University, Chongqing 400715, China;

<sup>b</sup>School of Materials Science and Engineering, Hebei University of Technology, Tianjin 300130, China

<sup>c</sup>Institute of High Performance Computing, Agency for Science, Technology and Research (A\*STAR), 138632, Singapore.

\*Corresponding author.

mail addresses: [ying\\_liu@hebut.edu.cn](mailto:ying_liu@hebut.edu.cn); [xiaotianwang@swu.edu.cn](mailto:xiaotianwang@swu.edu.cn); [zhangg@ihpc.a-star.edu.sg](mailto:zhangg@ihpc.a-star.edu.sg)

Table S1. obtained  $C_{11}$ ,  $C_{12}$ ,  $C_{22}$ , and  $C_{44}$  for C<sub>3</sub>Sc<sub>4</sub> at 0 %, 9.5 %, 13 % biaxial strains

| Strained | $C_{11}$ (N/m) | $C_{12}$ (N/m) | $C_{22}$ (N/m) | $C_{44}$ (N/m) |
|----------|----------------|----------------|----------------|----------------|
| 0%       | 150.122        | 53.251         | 150.562        | 53.217         |
| 9.5%     | 110.334        | 38.301         | 110.737        | 37.099         |
| 13%      | 61.125         | 25.546         | 60.696         | 15.865         |

In Figure S1, we plot the in-plane Young's modulus,  $Y$ , and Poisson's ration,  $\nu$ , along an arbitrary direction specified with the polar angle  $\theta$  ( $\theta$  is the angle relative to  $a$  direction) can be obtained as below<sup>S1</sup>:

$$Y(\theta) = \frac{\Delta}{C_{11}s^4 + C_{22}c^4 + (\frac{\Delta}{C_{44}} - 2C_{12})c^2s^2} \quad \text{Eq (S1)}$$

$$\nu(\theta) = \frac{(C_{11} + C_{22} - \frac{\Delta}{C_{44}})c^2s^2 - C_{12}(c^4 + s^4)}{C_{11}s^4 + C_{22}c^4 + (\frac{\Delta}{C_{44}} - 2C_{12})c^2s^2} \quad \text{Eq (S2)}$$

where  $\Delta = C_{11}C_{12} - C_{12}^2$ ,  $c = \cos(\theta)$ , and  $s = \sin(\theta)$ . Using Eqs. (S1) and (S2), and the elastic constants presented in Table S1, the  $\theta$  dependence of  $Y$  and  $\nu$  on C<sub>3</sub>Sc<sub>4</sub> at 0%, 9.5%, 13% biaxial strains are shown with polar coordinates in Figure S1. In such a plot, a fully isotropic elastic behavior is represented by a perfectly circular shape for  $Y$  and  $\nu$ . On the contrary, the shapes of  $Y$  and  $\nu$  in Figure S1 are anisotropic, with major axis and minor axis difference for C<sub>3</sub>Sc<sub>4</sub> at 0%, 9.5%, 13% biaxial strains, indicating that the mechanical properties of C<sub>3</sub>Sc<sub>4</sub> at 0%, 9.5%, 13% biaxial strains exhibit anisotropy.

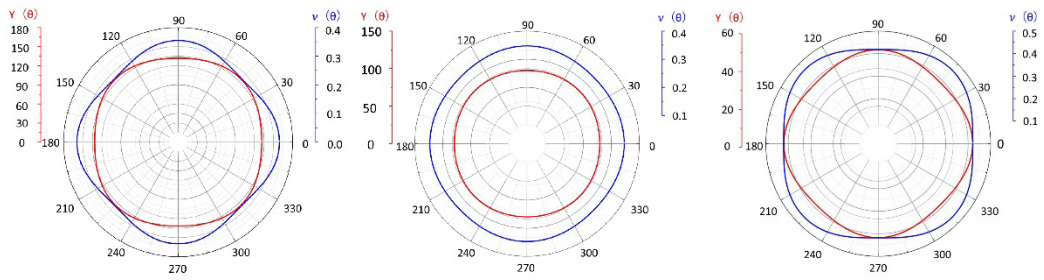

Figure S1. The  $\theta$  dependence of (a)  $Y$  and (b)  $\nu$  for C3Sc4 at 0% (left), 9.5% (middle), 13% (right) biaxial strains.

Reference

(S1) E. Cadelano, P. L. Palla, S. Giordano and L. Colombo, Phys. Rev. B: Condens. Matter Mater. Phys., 2010, 82, 235414.
